# Supplementary material
Source: PubMed Central journal article supplement (PMC6522321)
Supplement: NIHMS1500277-supplement-1.pdf [file NIHMS1500277-supplement-1.pdf]

**Supplement Table 1.** ADOS-BOSCC inter-rater reliability ( $n=22$ )

|         | Coder 1 |       |      | Coder 2 |       |      | <b>Intra-Class<br/>Correlation (ICC)</b> | ANOVA |          |
|---------|---------|-------|------|---------|-------|------|------------------------------------------|-------|----------|
|         | Mean    | SD    | SE   | Mean    | SD    | SE   | <b>Consistency</b>                       | F     | <i>p</i> |
| Overall | 34.91   | 10.96 | 3.30 | 35.45   | 11.83 | 3.57 | 0.96                                     | 0.164 | 0.694    |
| Core    | 26.00   | 8.90  | 2.69 | 26.86   | 8.66  | 2.61 | 0.96                                     | 0.251 | 0.628    |
| SC      | 33.68   | 10.50 | 3.17 | 34.36   | 11.61 | 3.50 | 0.92                                     | 0.375 | 0.554    |
| RRB     | 7.68    | 3.16  | 0.95 | 7.50    | 3.72  | 1.12 | 0.88                                     | 0.065 | 0.804    |

Inter-rater reliability for 22 videos that were coded by more than one coder; coder 1 and coder 2 are two randomly

**Supplement Table 2.** ADOS-BOSCC test-retest reliability (n=9)

| Domain  | ICC   |
|---------|-------|
| SC      | 0.845 |
| ASD     | 0.867 |
| RRB     | 0.854 |
| Overall | 0.870 |

Test-retest reliability for 18 observations (9 children) that were gathered less than two months apart from each other
